# Supplementary material
Source: Springer Nature journal article supplement (https://www.springermedizin.de/resource/supplementary/13054_2011_9763_MOESM2_ESM.pdf/9706982)

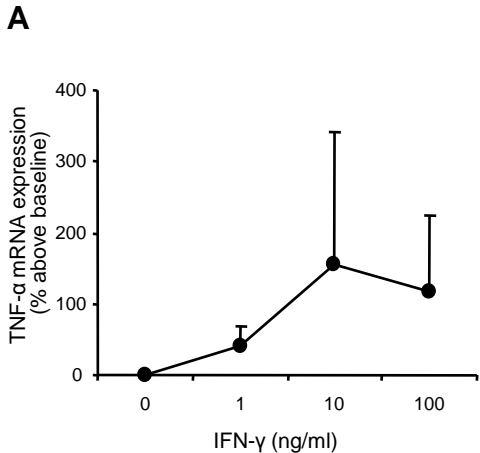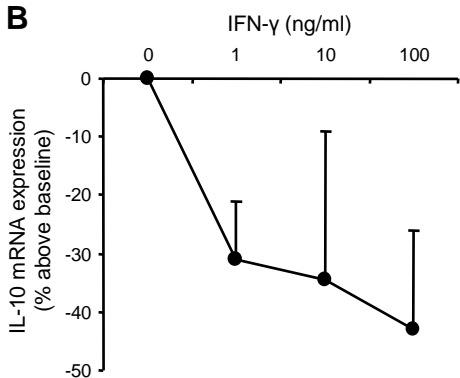

Supplement: MOESM2 [file 9706982]
